# Supplementary material
Source: PubMed Central journal article supplement (PMC5672813)
Supplement: NIHMS881982-supplement-2.pdf [file NIHMS881982-supplement-2.pdf]

## SUPPLEMENTARY INFORMATION

**Supplementary Table 1:** Rates of PZMs across ASC datasets, with the median depth and mode allele fraction of the *de novos* (Group A) in each dataset. The asterisk (\*) denotes the datasets where the median allele fraction was calculated instead of the mode allele fraction.

| <b>Dataset</b> | <b>Trios</b> | <b>Median depth</b> | <b>Mode allele fraction</b> | <b>All <i>de novos</i> (Group A)</b> | <b>Candidate PZMs (Group B)</b> | <b>High-confidence PZMs (Group C)</b> |
|----------------|--------------|---------------------|-----------------------------|--------------------------------------|---------------------------------|---------------------------------------|
| BCH            | 251          | 92                  | 0.50                        | 215                                  | 46 (21.4%)                      | 26 (12.1%)                            |
| Broad_v8       | 643          | 75                  | 0.50                        | 586                                  | 113 (19.3%)                     | 51 (8.7%)                             |
| Broad_v11      | 282          | 76                  | 0.47                        | 323                                  | 101 (31.3%)                     | 56 (17.3%)                            |
| Finnish        | 51           | 93                  | 0.50                        | 57                                   | 16 (28.1%)                      | 7 (12.3%)                             |
| Frankfurt      | 353          | 72                  | 0.50                        | 337                                  | 59 (17.5%)                      | 19 (5.6%)                             |
| MSSM           | 11           | 45                  | 0.40*                       | 6                                    | 1 (16.7%)                       | 1 (16.7%)                             |
| Sanger         | 67           | 75                  | 0.40                        | 48                                   | 2 (4.2%)                        | 1 (2.1%)                              |
| UPenn          | 35           | 88                  | 0.45                        | 26                                   | 3 (11.5%)                       | 2 (7.7%)                              |
| VU             | 37           | 70                  | 0.50                        | 31                                   | 9 (29.0%)                       | 6 (19.4%)                             |
| SSC_Probands   | 2299         | 67                  | 0.50                        | 1832                                 | 436 (23.8%)                     | 169 (9.2%)                            |
| ASC_Siblings   | 161          | 67                  | 0.50                        | 126                                  | 40 (31.7%)                      | 17 (13.5%)                            |
| SSC_Siblings   | 1757         | 62                  | 0.50                        | 1259                                 | 287 (22.8%)                     | 113 (9.0%)                            |
| <b>Total</b>   | <b>5947</b>  |                     |                             | <b>4846</b>                          | <b>1113 (23.0%)</b>             | <b>468 (9.7%)</b>                     |

**Supplementary Table 2:** Information of all probands and unaffected siblings in the study.

This list can be found in an attached Excel file.

**Supplementary Table 3:** List of all *de novo* mutations found in the probands and unaffected siblings.

This list can be found in an attached Excel file.

**Supplementary Table 4:** List of all *de novo* mutations that were validated using the different resequencing approaches.

This list can be found in an attached Excel file.

**Supplementary Table 5:** Quantitative RT-PCR results for assaying copy number variants.

This list can be found in an attached Excel file.

**Supplementary Table 6:** There is a strand bias towards the anti-sense (- strand) for PZMs in Groups B and C compared to the variants found only in Group A. The odds ratios and 2-tailed Fisher's Exact Test P-values are calculated with respect to the number of *de novo* variants found only in Group A.

|         | <b>- strand</b> | <b>+ strand</b> | <b>Odds ratio with<br/>95% confidence<br/>intervals</b> | <b>P-value</b>       |
|---------|-----------------|-----------------|---------------------------------------------------------|----------------------|
| Group A | 2438 (50.3%)    | 2408 (49.7%)    |                                                         |                      |
| Group B | 600 (53.9%)     | 513 (46.1%)     | 1.21 [1.05, 1.38]                                       | $6.3 \times 10^{-3}$ |
| Group C | 263 (56.2%)     | 205 (43.8%)     | 1.30 [1.07, 1.58]                                       | $7.5 \times 10^{-3}$ |

**Supplementary Table 7:** There is an excess of A-C and T-G mutations (in yellow) among the post-zygotic mutations in Groups B and C.

Group A:

| <b>Mutant</b>    | <b>A</b>     | <b>C</b>    | <b>G</b>    | <b>T</b>     |
|------------------|--------------|-------------|-------------|--------------|
| <b>Reference</b> |              |             |             |              |
| <b>A</b>         | -            | 145 (3.0%)  | 516 (10.6%) | 98 (2.0%)    |
| <b>C</b>         | 214 (4.4%)   | -           | 240 (5.0%)  | 1181 (24.4%) |
| <b>G</b>         | 1229 (25.4%) | 221 (4.6%)  | -           | 216 (4.5%)   |
| <b>T</b>         | 97 (2.0%)    | 518 (10.7%) | 171 (3.5%)  | -            |

Group B:

| <b>Mutant</b>    | <b>A</b>    | <b>C</b>   | <b>G</b>  | <b>T</b>    |
|------------------|-------------|------------|-----------|-------------|
| <b>Reference</b> |             |            |           |             |
| <b>A</b>         | -           | 54 (4.9%)  | 98 (8.8%) | 22 (2.0%)   |
| <b>C</b>         | 52 (4.7%)   | -          | 58 (5.2%) | 249 (22.4%) |
| <b>G</b>         | 273 (24.5%) | 66 (5.9%)  | -         | 47 (4.2%)   |
| <b>T</b>         | 27 (2.4%)   | 104 (9.3%) | 63 (5.7%) | -           |

Group C:

| <b>Mutant</b>    | <b>A</b>    | <b>C</b>  | <b>G</b>  | <b>T</b>    |
|------------------|-------------|-----------|-----------|-------------|
| <b>Reference</b> |             |           |           |             |
| <b>A</b>         | -           | 29 (6.2%) | 34 (7.3%) | 10 (2.1%)   |
| <b>C</b>         | 23 (4.9%)   | -         | 20 (4.3%) | 102 (21.8%) |
| <b>G</b>         | 110 (23.5%) | 27 (5.8%) | -         | 24 (5.1%)   |
| <b>T</b>         | 13 (2.8%)   | 42 (9.0%) | 34 (7.3%) | -           |

**Supplementary Table 8:** The excess of A-C mutations (in blue) among the post-zygotic mutations in Groups B and C is predominantly found on the sense (+) strand, whereas the excess of T-G mutations (in pink) is predominantly found on the anti-sense (-) strand.

Group A + strand (2408 mutations):

| <b>Mutant</b>    | <b>A</b>    | <b>C</b>   | <b>G</b>    | <b>T</b>    |
|------------------|-------------|------------|-------------|-------------|
| <b>Reference</b> |             |            |             |             |
| <b>A</b>         | -           | 84 (3.5%)  | 290 (12.0%) | 68 (2.8%)   |
| <b>C</b>         | 103 (4.3%)  | -          | 133 (5.5%)  | 588 (24.4%) |
| <b>G</b>         | 643 (26.7%) | 105 (4.4%) | -           | 112 (4.7%)  |
| <b>T</b>         | 39 (1.6%)   | 171 (7.1%) | 72 (3.0%)   | -           |

Group B + strand (513 mutations):

| <b>Mutant</b>    | <b>A</b>    | <b>C</b>  | <b>G</b>  | <b>T</b>    |
|------------------|-------------|-----------|-----------|-------------|
| <b>Reference</b> |             |           |           |             |
| <b>A</b>         | -           | 31 (6.0%) | 47 (9.2%) | 18 (3.5%)   |
| <b>C</b>         | 19 (3.7%)   | -         | 26 (5.1%) | 109 (21.2%) |
| <b>G</b>         | 138 (26.9%) | 30 (5.8%) | -         | 23 (4.5%)   |
| <b>T</b>         | 8 (1.6%)    | 40 (7.8%) | 24 (4.7%) | -           |

Group C + strand (205 mutations):

| <b>Mutant</b>    | <b>A</b>   | <b>C</b>  | <b>G</b>  | <b>T</b>   |
|------------------|------------|-----------|-----------|------------|
| <b>Reference</b> |            |           |           |            |
| <b>A</b>         | -          | 19 (9.3%) | 16 (7.8%) | 8 (3.9%)   |
| <b>C</b>         | 9 (4.4%)   | -         | 7 (3.4%)  | 37 (18.0%) |
| <b>G</b>         | 53 (25.9%) | 14 (6.8%) | -         | 12 (5.9%)  |
| <b>T</b>         | 3 (1.5%)   | 16 (7.8%) | 11 (5.4%) | -          |



Group A - strand (2438 mutations):

| <b>Mutant</b><br><b>Reference</b> | <b>A</b>    | <b>C</b>    | <b>G</b>   | <b>T</b>    |
|-----------------------------------|-------------|-------------|------------|-------------|
| <b>A</b>                          | -           | 61 (2.5%)   | 226 (9.3%) | 30 (1.2%)   |
| <b>C</b>                          | 111 (4.6%)  | -           | 107 (4.4%) | 593 (24.3%) |
| <b>G</b>                          | 586 (24.0%) | 116 (4.8%)  | -          | 104 (4.3%)  |
| <b>T</b>                          | 58 (2.4%)   | 347 (14.2%) | 99 (4.1%)  | -           |

Group B - strand (600 mutations):

| <b>Mutant</b><br><b>Reference</b> | <b>A</b>    | <b>C</b>   | <b>G</b>  | <b>T</b>    |
|-----------------------------------|-------------|------------|-----------|-------------|
| <b>A</b>                          | -           | 23 (3.8%)  | 51 (8.5%) | 4 (0.7%)    |
| <b>C</b>                          | 33 (5.5%)   | -          | 32 (5.3%) | 140 (23.3%) |
| <b>G</b>                          | 135 (22.5%) | 36 (6.0%)  | -         | 24 (4.0%)   |
| <b>T</b>                          | 19 (3.2%)   | 64 (10.7%) | 39 (6.5%) | -           |

Group C - strand (263 mutations):

| <b>Mutant</b><br><b>Reference</b> | <b>A</b>   | <b>C</b>  | <b>G</b>  | <b>T</b>   |
|-----------------------------------|------------|-----------|-----------|------------|
| <b>A</b>                          | -          | 10 (3.8%) | 18 (6.8%) | 2 (0.8%)   |
| <b>C</b>                          | 14 (5.3%)  | -         | 13 (4.9%) | 65 (24.7%) |
| <b>G</b>                          | 57 (21.7%) | 13 (4.9%) | -         | 12 (4.6%)  |
| <b>T</b>                          | 10 (3.8%)  | 26 (9.9%) | 23 (8.7%) | -          |

**Supplementary Table 9:** Association of PZMs in Groups B and C with late replication timing, but not early replication timing. The odds ratios and 2-tailed Fisher's Exact Test P-values are calculated with respect to the number of *de novo* variants found only in Group A.

|                | Number of variants | Early replication ( $Z \geq 1$ ) | Odds ratio with 95% confidence intervals | P-value |
|----------------|--------------------|----------------------------------|------------------------------------------|---------|
| <b>Group A</b> | 4846               | 2691 (55.5%)                     |                                          |         |
| <b>Group B</b> | 1113               | 597 (53.6%)                      | 0.91 [0.79, 1.04]                        | 0.15    |
| <b>Group C</b> | 468                | 246 (52.6%)                      | 0.88 [0.72, 1.07]                        | 0.19    |

|                | Number of variants | Late replication ( $Z \leq -1$ ) | Odds ratio with 95% confidence intervals | P-value |
|----------------|--------------------|----------------------------------|------------------------------------------|---------|
| <b>Group A</b> | 4846               | 183 (3.8%)                       |                                          |         |
| <b>Group B</b> | 1113               | 47 (4.2%)                        | 1.17 [0.81, 1.66]                        | 0.37    |
| <b>Group C</b> | 468                | 23 (4.9%)                        | 1.36 [0.83, 2.14]                        | 0.20    |

**Supplementary Table 10:** Number of *de novo* germline and mosaic mutations on the paternal or maternal haplotypes.

|                | <b>Paternal</b> | <b>Maternal</b> | <b>Ratio (Paternal/Maternal)</b> | <b>Binomial P</b>      |
|----------------|-----------------|-----------------|----------------------------------|------------------------|
| <b>Group A</b> | 1321            | 781             | 1.69                             | $1.50 \times 10^{-32}$ |
| <b>Group B</b> | 285             | 179             | 1.59                             | $4.92 \times 10^{-7}$  |
| <b>Group C</b> | 90              | 78              | 1.15                             | 0.2                    |

**Supplementary Table 11:** Distribution of functional categories between probands and siblings.

All Probands:

|                | <b>LoF</b> | <b>Missense</b> | <b>Silent</b> | <b>Total</b> |
|----------------|------------|-----------------|---------------|--------------|
| <b>Group A</b> | 265 (7.7%) | 2386 (68.9%)    | 810 (23.4%)   | 3461         |
| <b>Group B</b> | 50 (6.4%)  | 521 (66.3%)     | 215 (27.4%)   | 786          |
| <b>Group C</b> | 16 (4.7%)  | 231 (68.3%)     | 91 (26.9%)    | 338          |

All Siblings:

|                | <b>LoF</b> | <b>Missense</b> | <b>Silent</b> | <b>Total</b> |
|----------------|------------|-----------------|---------------|--------------|
| <b>Group A</b> | 61 (4.4%)  | 958 (69.2%)     | 366 (26.4%)   | 1385         |
| <b>Group B</b> | 15 (4.6%)  | 233 (71.3%)     | 79 (24.2%)    | 327          |
| <b>Group C</b> | 6 (4.6%)   | 95 (73.1%)      | 29 (22.3%)    | 130          |

SSC Probands:

|                | <b>LoF</b> | <b>Missense</b> | <b>Silent</b> | <b>Total</b> |
|----------------|------------|-----------------|---------------|--------------|
| <b>Group A</b> | 148 (8.1%) | 1261 (68.8%)    | 423 (23.1%)   | 1832         |
| <b>Group B</b> | 24 (5.5%)  | 299 (68.6%)     | 113 (25.9%)   | 436          |
| <b>Group C</b> | 6 (3.6%)   | 122 (72.2%)     | 41 (24.3%)    | 169          |

SSC Sibings:

|                | <b>LoF</b> | <b>Missense</b> | <b>Silent</b> | <b>Total</b> |
|----------------|------------|-----------------|---------------|--------------|
| <b>Group A</b> | 57 (4.5%)  | 862 (68.5%)     | 340 (27.0%)   | 1259         |
| <b>Group B</b> | 14 (4.9%)  | 202 (70.4%)     | 71 (24.7%)    | 287          |
| <b>Group C</b> | 6 (5.3%)   | 79 (70.0%)      | 28 (24.8%)    | 113          |

**Supplementary Table 12:** Distribution of predicted deleterious missense mutations in probands and siblings. The P-values are calculated using a 1-tailed Fisher's Exact Test.

|                | <b>Predicted deleterious missense mutations in probands</b> | <b>Total missense mutations in probands</b> | <b>Predicted deleterious missense mutations in siblings</b> | <b>Total missense mutations in siblings</b> | <b>P-value</b> |
|----------------|-------------------------------------------------------------|---------------------------------------------|-------------------------------------------------------------|---------------------------------------------|----------------|
| <b>Group A</b> | 872 (61.1%)                                                 | 1428                                        | 317 (56.1%)                                                 | 565                                         | 0.024          |
| <b>Group B</b> | 178 (59.9%)                                                 | 297                                         | 67 (50.4%)                                                  | 133                                         | 0.041          |
| <b>Group C</b> | 70 (55.1%)                                                  | 127                                         | 27 (50%)                                                    | 54                                          | 0.32           |

**Supplementary Table 13:** Gene-specific mutation rates for post-zygotic mutations estimated from the rare inherited variants.

This list can be found in an attached Excel file.

**Supplementary Table 14:** Recurrent non-synonymous PZMs in probands, with genes that are expressed in the brain in red text.

|                | Expected  | Observed | Hypergeometric P     |
|----------------|-----------|----------|----------------------|
| KLF16          | 0/84448   | 2/571    | $<1 \times 10^{-6}$  |
| MSANTD2        | 1/84448   | 2/571    | $<1 \times 10^{-6}$  |
| POLA2          | 2/84448   | 2/571    | $4.6 \times 10^{-5}$ |
| SMARCA4        | 11/84448  | 3/572    | $4.9 \times 10^{-5}$ |
| AZGP1          | 4/84448   | 2/571    | $2.7 \times 10^{-4}$ |
| CNGB3          | 5/84448   | 2/571    | $4.5 \times 10^{-4}$ |
| HNRNPU         | 5/84448   | 2/571    | $4.5 \times 10^{-4}$ |
| SCN2A          | 5/84448   | 2/571    | $4.5 \times 10^{-4}$ |
| EPPK1          | 58/84448  | 4/571    | $6.6 \times 10^{-4}$ |
| CARD11         | 7/84448   | 2/571    | $9.4 \times 10^{-4}$ |
| SYNJ1          | 8/84448   | 2/571    | $1.2 \times 10^{-3}$ |
| MEGF11         | 10/84448  | 2/571    | $2.0 \times 10^{-3}$ |
| SASH1          | 10/84448  | 2/571    | $2.0 \times 10^{-3}$ |
| MYO5C          | 14/84448  | 2/571    | $3.9 \times 10^{-3}$ |
| TECTA          | 14/84448  | 2/571    | $3.9 \times 10^{-3}$ |
| MUC12          | 233/84448 | 6/571    | $5.3 \times 10^{-3}$ |
| DYNC1H1        | 21/84448  | 2/571    | $8.8 \times 10^{-3}$ |
| PRKDC          | 30/84448  | 2/571    | 0.018                |
| USH2A          | 35/84448  | 2/571    | 0.023                |
| RP11-1407O15.2 | 39/84448  | 2/571    | 0.029                |
| DNAH17         | 40/84448  | 2/571    | 0.030                |
| NBPF10         | 70/84448  | 2/571    | 0.082                |
| NBPF1          | 77/84448  | 2/571    | 0.096                |
| HRNR           | 115/84448 | 2/571    | 0.18                 |
| AHNAK2         | 221/84448 | 3/571    | 0.19                 |
| FLG            | 200/84448 | 2/571    | 0.39                 |
| MUC4           | 471/84448 | 4/571    | 0.39                 |

**Supplementary Table 15:** Recurrent non-synonymous PZMs in siblings, with genes that are expressed in the brain in red text.

|        | Expected | Observed | Hypergeometric P     |
|--------|----------|----------|----------------------|
| TRPS1  | 5/84448  | 2/248    | $8.5 \times 10^{-5}$ |
| MYCBP2 | 26/84448 | 2/248    | $2.7 \times 10^{-3}$ |



## Supplementary Note: List of Autism Sequencing Consortium members.

Aleksic Branko<sup>1</sup>, Anney Richard<sup>2</sup>, Barbosa Mafalda<sup>3,4,5,6</sup>, Barrett Jeffrey<sup>7</sup>, Betancur Catalina<sup>8</sup>, Bishop Somer<sup>9</sup>, Brusco Alfredo<sup>10,11</sup>, Buxbaum Joseph D.<sup>3,4,5,12,13,14</sup>, Carracedo Angel<sup>15,16</sup>, Chiocchetti Andreas G.<sup>17</sup>, Chung Brian H.Y.<sup>18</sup>, Cook Edwin<sup>19</sup>, Coon Hilary<sup>20,21</sup>, Cutler David J.<sup>22</sup>, Daly Mark<sup>23,24,25</sup>, De Rubeis Silvia<sup>4,12</sup>, Doan Ryan<sup>26</sup>, Fernández-Prieto Montserrat<sup>15</sup>, Ferrero Giovanni Battista<sup>10</sup>, Freitag Christine M.<sup>17</sup>, Fromer Menachem<sup>5,12,27</sup>, Gargus Jay<sup>28,29,30</sup>, Geschwind Dan<sup>31,32,33</sup>, Gill Michael<sup>2</sup>, Gómez-Guerrero Lorena<sup>15</sup>, Hansen-Kiss Emily<sup>34</sup>, He Xin<sup>35</sup>, Herman Gail<sup>34</sup>, Hertz-Picciotto Irva<sup>36</sup>, Hultman Christina<sup>37</sup>, Iliadou Bozenna<sup>37</sup>, Ionita-Laza Iuliana<sup>38</sup>, Jugessur Anil<sup>39</sup>, Knudsen Gun Peggy<sup>39</sup>, Kolevzon Alexander<sup>4,12,40</sup>, Kosmicki Jack<sup>27</sup>, Kushima Itaru<sup>1</sup>, Lee S.L.<sup>18</sup>, Lehner Thomas<sup>41</sup>, Lennertz Savannah<sup>4,12</sup>, Lim Elaine<sup>26</sup>, Maciel Patricia<sup>42</sup>, Magnus Per<sup>39</sup>, Manoach Dara<sup>23</sup>, Minshev Nancy<sup>43</sup>, Morrow Eric<sup>44</sup>, Mulle Jennifer<sup>22</sup>, Neale Benjamin<sup>25</sup>, Ozaki Norio<sup>1</sup>, Palotie Aarno<sup>27,45,46,47</sup>, Parellada Mara<sup>48</sup>, Passos-Bueno Maria Rita<sup>49</sup>, Pericak-Vance Margaret<sup>50</sup>, Persico Antonio<sup>51,52</sup>, Pessah Isaac<sup>36</sup>, Reichenberg Avi<sup>4,12,53</sup>, Reichert Jennifer<sup>4,12</sup>, Renieri Alessandra<sup>54</sup>, Robinson Elise<sup>23,24,25</sup>, Samocha Kaitlin<sup>25,27,45,55</sup>, Sanders Stephan<sup>9</sup>, Sandin Sven<sup>4,12,37</sup>, Santangelo Susan L.<sup>56</sup>, Schafer Chad<sup>57</sup>, Schellenberg Gerry<sup>58</sup>, Scherer Stephen<sup>59,60</sup>, Senthil Geetha<sup>41</sup>, Silva Marisol<sup>36</sup>, Singh Tarjinder<sup>7</sup>, Siper Paige M.<sup>4,12</sup>, Soares Gabriela<sup>61</sup>, Stevens Christine<sup>25</sup>, Stoltenberg Camilla<sup>39</sup>, Surén Pål<sup>39</sup>, Sutcliffe James S.<sup>62,63</sup>, Szatmari Peter<sup>64</sup>, Tassone Flora<sup>36,65</sup>, Thurm Audrey<sup>41</sup>, Walsh Christopher<sup>26</sup>, Weiss Lauren<sup>9</sup>, Werling Donna<sup>9</sup>, Willsey Jeremy<sup>9</sup>, Xu Xinyi<sup>4,12</sup>, Yu Tim<sup>26</sup>, Yuen Ryan<sup>59</sup>, Zwick Michael E.<sup>22</sup>

<sup>1</sup>Department of Psychiatry, Graduate School of Medicine, Nagoya University, Nagoya, Japan. <sup>2</sup>Department of Psychiatry, School of Medicine, Trinity College Dublin, Dublin, Ireland. <sup>3</sup>The Mindich Child Health and Development Institute, Icahn School of Medicine at Mount Sinai, New York, New York, USA. <sup>4</sup>Seaver Autism Center for Research and Treatment, Icahn School of Medicine at Mount Sinai, New York, New York, USA. <sup>5</sup>Department of Genetics and Genomic Sciences, Icahn School of Medicine at Mount Sinai, New York, New York, USA. <sup>6</sup>Instituto Gulbenkian de Ciência, Oeiras, Portugal. <sup>7</sup>The Wellcome Trust Sanger Institute, Cambridge, United Kingdom. <sup>8</sup>Sorbonne Universités, UPMC Univ Paris 06, INSERM, CNRS, Neuroscience Paris Seine – Institut de Biologie Paris Seine, Paris, France. <sup>9</sup>Department of Psychiatry, University of California at San Francisco, San Francisco, California, USA. <sup>10</sup>University of Torino, Department of Medical Sciences, 10126, Turin, Italy. <sup>11</sup>Città della Salute e della Scienza University Hospital, Medical Genetics Unit, 10126, Turin, Italy. <sup>12</sup>Department of Psychiatry, Icahn School of Medicine at Mount Sinai, New York, New York, USA. <sup>13</sup>Friedman Brain Institute, Icahn School of Medicine at Mount Sinai, New York, New York, USA. <sup>14</sup>Department of Neuroscience, Icahn School of Medicine at Mount Sinai, New York, New York, USA. <sup>15</sup>Universidade de Santiago de Compostela, Spain. <sup>16</sup>Fundacion Publica Galega de Medicina Xenomica-SERGAS, Santiago de Compostela, Spain. <sup>17</sup>Department of Child and Adolescent Psychiatry, Psychosomatics and Psychotherapy, Goethe University Frankfurt, Frankfurt, Germany. <sup>18</sup>Department of Paediatrics and Adolescent Medicine, Li Ka Shing Faculty of Medicine, The University of Hong Kong, Hong Kong, China. <sup>19</sup>Institute for Juvenile Research, Department of Psychiatry, University of Illinois at Chicago, Chicago, Illinois, USA. <sup>20</sup>Department of Internal Medicine, University of Utah, Salt Lake City, Utah, USA. <sup>21</sup>Department of Psychiatry, University of Utah, Salt Lake City, Utah, USA. <sup>22</sup>Department of Human Genetics, Emory University School of Medicine, Atlanta, Georgia, USA. <sup>23</sup>Harvard Medical School, Boston, Massachusetts, USA. <sup>24</sup>Center for Human Genetic Research, Department of Medicine, Massachusetts General Hospital, Boston, Massachusetts, USA. <sup>25</sup>The Broad Institute of MIT and Harvard. <sup>26</sup>Division of Genetics, Boston Children's Hospital, Boston, Massachusetts, USA. <sup>27</sup>Analytic and Translational Genetics Unit, Department of Medicine, Massachusetts General Hospital, Boston, Massachusetts, USA. <sup>28</sup>Department of Physiology and Biophysics, School of Medicine, University of California, Irvine, California, USA. <sup>29</sup>Center for Autism Research and Translation, University of California, Irvine, California, USA. <sup>30</sup>Division of Human Genetics & Genomics, Department of Pediatrics, School of Medicine, University of California, Irvine, California, USA. <sup>31</sup>Center for Autism Research and Treatment and Program in Neurobehavioral Genetics, Semel Institute, David Geffen School of Medicine, University of California, Los Angeles,

Los Angeles, California 90095, USA. <sup>32</sup>Department of Neurology, David Geffen School of Medicine, University of California Los Angeles, 695 Charles E. Young Drive South, Los Angeles, California 90095, USA. <sup>33</sup>Department of Human Genetics, David Geffen School of Medicine, University of California, Los Angeles, California, USA. <sup>34</sup>Institute for Genomic Medicine, Nationwide Children's Hospital and Department of Pediatrics, The Ohio State University, Columbus, Ohio, USA. <sup>35</sup>Department of Human Genetics, University of Chicago, Chicago, Illinois, USA. <sup>36</sup>The MIND (Medical Investigation of Neurodevelopmental Disorders) Institute, University of California, Davis, Davis, CA. <sup>37</sup>Department of Medical Epidemiology and Biostatistics, Karolinska Institutet, SE- 171 77 Stockholm, Sweden. <sup>38</sup>Department of Biostatistics, Columbia University, New York, New York, USA. <sup>39</sup>Norwegian Institute of Public Health, Oslo, Norway. <sup>40</sup>Department of Pediatrics, Icahn School of Medicine at Mount Sinai, New York, New York, USA. <sup>41</sup>National Institute of Mental Health, Bethesda, MD, USA. <sup>42</sup>Life and Health Sciences Research Institute (ICVS), School of Health Sciences, University of Minho, Braga, Portugal ICVS/3B's-PT Government Associate Laboratory, Braga/Guimarães, Portugal. <sup>43</sup>Department of Psychiatry, University of Pittsburgh School of Medicine, Pittsburgh, Pennsylvania, USA. <sup>44</sup>Department of Molecular Biology, Cell Biology and Biochemistry and Department of Psychiatry and Human Behavior, Brown University, Providence, Rhode Island, USA. <sup>45</sup>Program in Medical and Population Genetics, Broad Institute of MIT and Harvard, Cambridge, Massachusetts, USA. <sup>46</sup>Institute for Molecular Medicine Finland, University of Helsinki, Helsinki, Finland. <sup>47</sup>Psychiatric & Neurodevelopmental Genetics Unit, Department of Psychiatry, Massachusetts General Hospital, Boston, MA, USA. <sup>48</sup>Child and Adolescent Psychiatry Department, Hospital General Universitario Gregorio Marañón, Madrid, Spain. <sup>49</sup>Centro de Estudos do Genoma Humano, Departamento de Genética e Biologia Evolutiva, Instituto de Biociências, Universidade de São Paulo, Rua do Matão 277, Sala 200 CEP 05508-900 São Paulo, SP, Brazil. <sup>50</sup>John P. Hussman Institute for Human Genomics, University of Miami, Miami, Florida, United States of America. <sup>51</sup>Mafalda Luce Center for Pervasive Developmental Disorders, Milan, Italy. <sup>52</sup>Unit of Child and Adolescent Neuropsychiatry, Gaetano Martino University Hospital, University of Messina, Messina, Italy. <sup>53</sup>Department of Preventive Medicine, Icahn School of Medicine at Mount Sinai, New York, New York, USA. <sup>54</sup>Medical Genetics, Department of Medical Biotechnologies, University of Siena, 53100 Siena, Italy. <sup>55</sup>Stanley Center for Psychiatric Research, Broad Institute of Harvard and MIT, Cambridge, Massachusetts, USA. <sup>56</sup>Maine Medical Center and Maine Medical Center Research Institute, Tufts University School of Medicine, 66 Bramhall Street, Portland, ME 04102 USA. <sup>57</sup>Department of Statistics, Carnegie Mellon University, Pittsburgh, Pennsylvania, USA. <sup>58</sup>Geisinger Health System, Danville, Pennsylvania, USA. <sup>59</sup>Program in Genetics and Genome Biology, The Centre for Applied Genomics, The Hospital for Sick Children, Toronto, Ontario M5G 1L7, Canada. <sup>60</sup>McLaughlin Centre, University of Toronto, Toronto, Ontario M5S 1A1, Canada. <sup>61</sup>Center for Medical Genetics Dr. Jacinto Magalhães, Porto Hospital Center, Porto, Portugal. <sup>62</sup>Vanderbilt Brain Institute, Vanderbilt University School of Medicine, Nashville, Tennessee, USA. <sup>63</sup>Department of Molecular Physiology and Biophysics and Psychiatry, Vanderbilt University School of Medicine, Nashville, Tennessee, USA. <sup>64</sup>Department of Psychiatry and Behavioural Neurosciences, Offord Centre for Child Studies, McMaster University, Hamilton, Ontario L8S 4K1, Canada. <sup>65</sup>Department of Biochemistry and Molecular Medicine, University of California, Davis, School of Medicine, Davis, CA, USA.
